# Supplementary material for: Population structure and adaptive variation of Helichrysum italicum (Roth) G. Don along eastern Adriatic temperature and precipitation gradient
Source: PubMed Central journal article supplement (PMC8692458; doi:10.1038/s41598-021-03548-6), 2021-12-21

**Population structure and adaptive variation of *Helichrysum italicum* /Roth/  
G. Don along eastern Adriatic temperature and precipitation gradient**

Tonka Ninčević<sup>1</sup>, Marija Jug-Dujaković<sup>1</sup>, Martina Grdiša<sup>2,3\*</sup>, Zlatko Liber<sup>3,4</sup>, Filip Varga<sup>2,3</sup>,  
Dejan Pljevljakušić<sup>5</sup>, Zlatko Šatović<sup>2,3</sup>

<sup>1</sup>Institute for Adriatic Crops and Karst Reclamation, Department for Plant Sciences, Put  
Duilova 11, 21000 Split, Croatia

<sup>2</sup>University of Zagreb, Faculty of Agriculture, Department of Seed Science and Technology,  
Svetošimunska c. 25, 10000 Zagreb, Croatia

<sup>3</sup>Centre of Excellence for Biodiversity and Molecular Plant Breeding (CoE CroP-BioDiv),  
Svetošimunska c. 25, 10000 Zagreb, Croatia

<sup>4</sup>University of Zagreb, Faculty of Science, Department of Biology, Marulićev trg 9a, 10000,  
Zagreb, Croatia

<sup>5</sup>Institute for Medicinal Plants Research “Dr Josif Pančić”, Tadeuša Koščuška 1, 11000  
Belgrade, Serbia

**\*Correspondence:**

Martina Grdiša  
[mgrdisa@agr.hr](mailto:mgrdisa@agr.hr)

Table S1. Interpopulation  $\phi_{ST}$  values among 18 *Helichrysum italicum* populations from east Adriatic coast. Lower diagonal matrix:  $\phi_{ST}$  values.  
Upper diagonal matrix: corresponding  $P(\phi_{ST})$  values.

| No. | Population | P01   | P02   | P03   | P04   | P05   | P06   | P07   | P08   | P09   | P10   | P11   | P12   | P13   | P14   | P15   | P16   | P17   | P18 |
|-----|------------|-------|-------|-------|-------|-------|-------|-------|-------|-------|-------|-------|-------|-------|-------|-------|-------|-------|-----|
| P01 | Krk        |       | ***   | ***   | ***   | ***   | ***   | ***   | ***   | ***   | ***   | ***   | ***   | ***   | ***   | ***   | ***   | ***   | *** |
| P02 | Cres       | 0.018 |       | ***   | ***   | ***   | ***   | ***   | ***   | ***   | ***   | ***   | ***   | ***   | ***   | ***   | ***   | ***   | *** |
| P03 | Lošinj     | 0.041 | 0.026 |       | ***   | ***   | ***   | ***   | ***   | ***   | ***   | ***   | ***   | ***   | ***   | ***   | ***   | ***   | *** |
| P04 | Rab        | 0.036 | 0.041 | 0.047 |       | ***   | ***   | ***   | ***   | ***   | ***   | ***   | ***   | ***   | ***   | ***   | ***   | ***   | *** |
| P05 | Pag 1      | 0.046 | 0.053 | 0.050 | 0.051 |       | ***   | ***   | ***   | ***   | ***   | ***   | ***   | ***   | ***   | ***   | ***   | ***   | *** |
| P06 | Pag 2      | 0.079 | 0.074 | 0.060 | 0.073 | 0.060 |       | ***   | ***   | ***   | ***   | ***   | ***   | ***   | ***   | ***   | ***   | ***   | *** |
| P07 | Obrovac    | 0.060 | 0.061 | 0.049 | 0.057 | 0.060 | 0.049 |       | ***   | ***   | ***   | ***   | ***   | ***   | ***   | ***   | ***   | ***   | *** |
| P08 | Benkovac   | 0.078 | 0.092 | 0.103 | 0.101 | 0.100 | 0.104 | 0.085 |       | ***   | ***   | ***   | ***   | ***   | ***   | ***   | ***   | ***   | *** |
| P09 | Kistanje   | 0.044 | 0.052 | 0.049 | 0.065 | 0.044 | 0.062 | 0.038 | 0.054 |       | *     | ***   | ***   | ***   | ***   | ***   | ***   | ***   | *** |
| P10 | Unešić     | 0.052 | 0.061 | 0.051 | 0.073 | 0.053 | 0.063 | 0.054 | 0.061 | 0.010 |       | ***   | ***   | ***   | ***   | ***   | ***   | ***   | *** |
| P11 | Seget      | 0.077 | 0.074 | 0.086 | 0.092 | 0.091 | 0.094 | 0.092 | 0.023 | 0.041 | 0.044 |       | ***   | ***   | ***   | ***   | ***   | ***   | *** |
| P12 | Brač       | 0.086 | 0.093 | 0.085 | 0.100 | 0.080 | 0.084 | 0.073 | 0.073 | 0.036 | 0.042 | 0.068 |       | ***   | ***   | ***   | ***   | ***   | *** |
| P13 | Hvar       | 0.107 | 0.114 | 0.121 | 0.123 | 0.127 | 0.112 | 0.108 | 0.038 | 0.077 | 0.077 | 0.042 | 0.067 |       | ***   | ***   | ***   | ***   | *** |
| P14 | Sinj       | 0.072 | 0.071 | 0.067 | 0.086 | 0.063 | 0.082 | 0.054 | 0.069 | 0.026 | 0.024 | 0.055 | 0.048 | 0.099 |       | ***   | ***   | ***   | *** |
| P15 | Omiš       | 0.095 | 0.103 | 0.112 | 0.107 | 0.107 | 0.105 | 0.099 | 0.049 | 0.065 | 0.056 | 0.040 | 0.052 | 0.029 | 0.071 |       | ***   | ***   | *** |
| P16 | Živogošće  | 0.083 | 0.089 | 0.091 | 0.096 | 0.083 | 0.090 | 0.076 | 0.070 | 0.039 | 0.043 | 0.057 | 0.035 | 0.057 | 0.053 | 0.044 |       | ***   | *** |
| P17 | Slano      | 0.081 | 0.093 | 0.085 | 0.101 | 0.093 | 0.090 | 0.071 | 0.075 | 0.042 | 0.041 | 0.060 | 0.025 | 0.059 | 0.053 | 0.047 | 0.030 |       | *** |
| P18 | Cavtat     | 0.070 | 0.083 | 0.084 | 0.075 | 0.078 | 0.073 | 0.056 | 0.085 | 0.062 | 0.073 | 0.080 | 0.066 | 0.076 | 0.081 | 0.063 | 0.056 | 0.054 |     |

$P$ -value significance level: <sup>ns</sup> $P > 0.05$ ,  $*0.01 < P < 0.05$ ,  $**0.001 < P < 0.01$ ,  $***P < 0.001$ .

Table S2. Correlations among 19 bioclimatic variables at 18 *Helichrysum italicum* sampling sites from the east Adriatic coast. Lower diagonal matrix: correlation coefficients ( $r$ ). Upper diagonal matrix: corresponding  $P$ -values.

| Bioclimatic variable | Bio01  | Bio02  | Bio03  | Bio04  | Bio05  | Bio06  | Bio07  | Bio08  | Bio09  | Bio10  | Bio11  | Bio12 | Bio13 | Bio14  | Bio15  | Bio16 | Bio17  | Bio18  | Bio19 |
|----------------------|--------|--------|--------|--------|--------|--------|--------|--------|--------|--------|--------|-------|-------|--------|--------|-------|--------|--------|-------|
| Bio01                |        | *      | ns     | ns     | ***    | ***    | *      | ns     | ***    | ***    | ***    | ns    | ns    | ns     | ns     | ns    | ns     | ns     | ns    |
| Bio02                | -0.469 |        | ***    | ns     | ns     | ***    | ***    | ns     | ns     | ns     | *      | ns    | ns    | ns     | ns     | ns    | ns     | ns     | ns    |
| Bio03                | -0.410 | 0.940  |        | ns     | ns     | **     | ***    | ns     | ns     | ns     | ns     | ns    | ns    | ns     | ns     | ns    | ns     | ns     | ns    |
| Bio04                | -0.414 | 0.441  | 0.141  |        | ns     | *      | ***    | ns     | ns     | ns     | *      | ns    | ns    | ns     | ns     | ns    | ns     | ns     | *     |
| Bio05                | 0.750  | 0.160  | 0.087  | 0.116  |        | *      | ns     | ns     | ***    | ***    | **     | ns    | ns    | ns     | ns     | ns    | ns     | ns     | ns    |
| Bio06                | 0.942  | -0.715 | -0.618 | -0.566 | 0.501  |        | ***    | ns     | ***    | ***    | ***    | ns    | ns    | ns     | ns     | ns    | ns     | ns     | ns    |
| Bio07                | -0.521 | 0.933  | 0.768  | 0.731  | 0.166  | -0.770 |        | ns     | ns     | ns     | **     | ns    | ns    | ns     | ns     | ns    | ns     | ns     | ns    |
| Bio08                | -0.149 | 0.038  | 0.046  | -0.029 | -0.209 | -0.168 | 0.037  |        | ns     | ns     | ns     | ns    | ns    | **     | **     | ns    | **     | **     | ns    |
| Bio09                | 0.971  | -0.412 | -0.430 | -0.191 | 0.828  | 0.878  | -0.390 | -0.155 |        | ***    | ***    | ns    | ns    | ns     | ns     | ns    | ns     | ns     | ns    |
| Bio10                | 0.971  | -0.412 | -0.430 | -0.191 | 0.828  | 0.878  | -0.390 | -0.155 | 1.000  |        | ***    | ns    | ns    | ns     | ns     | ns    | ns     | ns     | ns    |
| Bio11                | 0.978  | -0.543 | -0.429 | -0.589 | 0.624  | 0.972  | -0.647 | -0.137 | 0.905  | 0.905  |        | ns    | ns    | ns     | ns     | ns    | ns     | ns     | ns    |
| Bio12                | -0.098 | 0.012  | 0.183  | -0.411 | -0.276 | -0.050 | -0.146 | 0.197  | -0.236 | -0.236 | -0.007 |       | ***   | ns     | ns     | ***   | *      | *      | ***   |
| Bio13                | -0.116 | 0.063  | 0.229  | -0.407 | -0.260 | -0.067 | -0.115 | -0.009 | -0.255 | -0.255 | -0.020 | 0.953 |       | ns     | ns     | ***   | ns     | ns     | ***   |
| Bio14                | -0.361 | 0.187  | 0.194  | 0.149  | -0.297 | -0.394 | 0.230  | 0.667  | -0.363 | -0.363 | -0.374 | 0.435 | 0.176 |        | ***    | ns    | ***    | ***    | ns    |
| Bio15                | 0.292  | -0.095 | -0.024 | -0.316 | 0.194  | 0.323  | -0.225 | -0.666 | 0.227  | 0.227  | 0.343  | 0.149 | 0.412 | -0.801 |        | ns    | ***    | ***    | **    |
| Bio16                | -0.104 | 0.079  | 0.247  | -0.404 | -0.239 | -0.068 | -0.098 | 0.053  | -0.243 | -0.243 | -0.013 | 0.977 | 0.992 | 0.273  | 0.331  |       | ns     | ns     | ***   |
| Bio17                | -0.288 | 0.133  | 0.163  | 0.064  | -0.272 | -0.311 | 0.154  | 0.659  | -0.307 | -0.307 | -0.290 | 0.563 | 0.309 | 0.984  | -0.716 | 0.403 |        | ***    | ns    |
| Bio18                | -0.288 | 0.133  | 0.163  | 0.064  | -0.272 | -0.311 | 0.154  | 0.659  | -0.307 | -0.307 | -0.290 | 0.563 | 0.309 | 0.984  | -0.716 | 0.403 | 1.000  |        | ns    |
| Bio19                | 0.141  | -0.161 | 0.004  | -0.505 | -0.107 | 0.223  | -0.333 | -0.257 | 0.003  | 0.003  | 0.240  | 0.812 | 0.922 | -0.160 | 0.680  | 0.889 | -0.009 | -0.009 |       |

$P$ -value significance level: <sup>ns</sup> $P > 0.05$ ,  $*0.01 < P < 0.05$ ,  $**0.001 < P < 0.01$ ,  $***P < 0.001$ .

Table S3. Values of 19 bioclimatic variables of 18 *Helichrysum italicum* sampling sites from east Adriatic coast obtained from the WorldClim database<sup>110</sup>

| No.   | Bioclimatic variable                | Sampling site (Population) |      |      |      |      |      |      |      |      |      |      |      |      |      |      |      |      |      |
|-------|-------------------------------------|----------------------------|------|------|------|------|------|------|------|------|------|------|------|------|------|------|------|------|------|
|       |                                     | P01                        | P02  | P03  | P04  | P05  | P06  | P07  | P08  | P09  | P10  | P11  | P12  | P13  | P14  | P15  | P16  | P17  | P18  |
| Bio01 | Annual Mean Temperature             | 145                        | 131  | 140  | 138  | 139  | 134  | 129  | 122  | 129  | 131  | 129  | 157  | 146  | 136  | 149  | 150  | 142  | 132  |
| Bio02 | Mean Diurnal Range                  | 81                         | 75   | 79   | 89   | 92   | 100  | 100  | 92   | 94   | 84   | 79   | 77   | 75   | 83   | 82   | 83   | 83   | 82   |
| Bio03 | Isothermality                       | 31                         | 30   | 31   | 32   | 34   | 35   | 35   | 33   | 33   | 31   | 30   | 30   | 30   | 30   | 31   | 31   | 32   | 32   |
| Bio04 | Temperature Seasonality             | 6284                       | 6194 | 6164 | 6355 | 6265 | 6291 | 6415 | 6494 | 6522 | 6476 | 6421 | 6193 | 6068 | 6603 | 6370 | 6320 | 6154 | 6011 |
| Bio05 | Max Temperature of Warmest Month    | 287                        | 268  | 279  | 286  | 287  | 289  | 285  | 274  | 282  | 278  | 273  | 296  | 283  | 286  | 295  | 296  | 284  | 269  |
| Bio06 | Min Temperature of Coldest Month    | 28                         | 18   | 25   | 16   | 17   | 8    | 2    | -2   | 2    | 11   | 12   | 45   | 38   | 17   | 33   | 34   | 27   | 18   |
| Bio07 | Temperature Annual Range            | 259                        | 250  | 254  | 270  | 270  | 281  | 283  | 276  | 280  | 267  | 261  | 251  | 245  | 269  | 262  | 262  | 257  | 251  |
| Bio08 | Mean Temperature of Wettest Quarter | 112                        | 100  | 109  | 105  | 106  | 101  | 94   | 87   | 95   | 98   | 97   | 96   | 87   | 101  | 84   | 84   | 78   | 102  |
| Bio09 | Mean Temperature of Driest Quarter  | 227                        | 211  | 220  | 220  | 220  | 216  | 212  | 206  | 213  | 215  | 213  | 238  | 226  | 223  | 232  | 232  | 221  | 210  |
| Bio10 | Mean Temperature of Warmest Quarter | 227                        | 211  | 220  | 220  | 220  | 216  | 212  | 206  | 213  | 215  | 213  | 238  | 226  | 223  | 232  | 232  | 221  | 210  |
| Bio11 | Mean Temperature of Coldest Quarter | 67                         | 54   | 63   | 58   | 60   | 55   | 48   | 40   | 47   | 50   | 49   | 81   | 72   | 54   | 70   | 71   | 66   | 58   |
| Bio12 | Annual Precipitation                | 1289                       | 1179 | 1050 | 1138 | 1089 | 1047 | 1020 | 1021 | 987  | 941  | 927  | 835  | 909  | 967  | 964  | 1092 | 1279 | 1301 |
| Bio13 | Precipitation of Wettest Month      | 158                        | 147  | 133  | 147  | 141  | 139  | 137  | 137  | 133  | 127  | 124  | 111  | 121  | 129  | 130  | 150  | 178  | 182  |
| Bio14 | Precipitation of Driest Month       | 72                         | 65   | 56   | 59   | 55   | 51   | 51   | 53   | 51   | 47   | 46   | 35   | 37   | 45   | 39   | 39   | 40   | 40   |
| Bio15 | Precipitation Seasonality           | 27                         | 26   | 26   | 29   | 30   | 31   | 30   | 30   | 31   | 31   | 31   | 33   | 34   | 31   | 34   | 37   | 40   | 39   |
| Bio16 | Precipitation of Wettest Quarter    | 456                        | 410  | 367  | 413  | 397  | 388  | 379  | 379  | 367  | 348  | 341  | 304  | 336  | 350  | 355  | 413  | 487  | 493  |
| Bio17 | Precipitation of Driest Quarter     | 241                        | 218  | 190  | 200  | 187  | 175  | 173  | 175  | 169  | 160  | 156  | 128  | 134  | 163  | 145  | 148  | 154  | 154  |
| Bio18 | Precipitation of Warmest Quarter    | 241                        | 218  | 190  | 200  | 187  | 175  | 173  | 175  | 169  | 160  | 156  | 128  | 134  | 163  | 145  | 148  | 154  | 154  |
| Bio19 | Precipitation of Coldest Quarter    | 342                        | 314  | 283  | 310  | 300  | 291  | 286  | 289  | 281  | 276  | 275  | 263  | 296  | 294  | 310  | 367  | 433  | 429  |

Figure S1. The choice of the most likely number of clusters ( $K$ ) inferred from multilocus AFLP data of 18 *Helichrysum italicum* populations from east Adriatic coast using Structure<sup>115</sup>:  $\ln P(X|K)$  values for each of the 30 independent runs for each  $K$  and  $\Delta K$  values for each  $K$ <sup>128</sup>

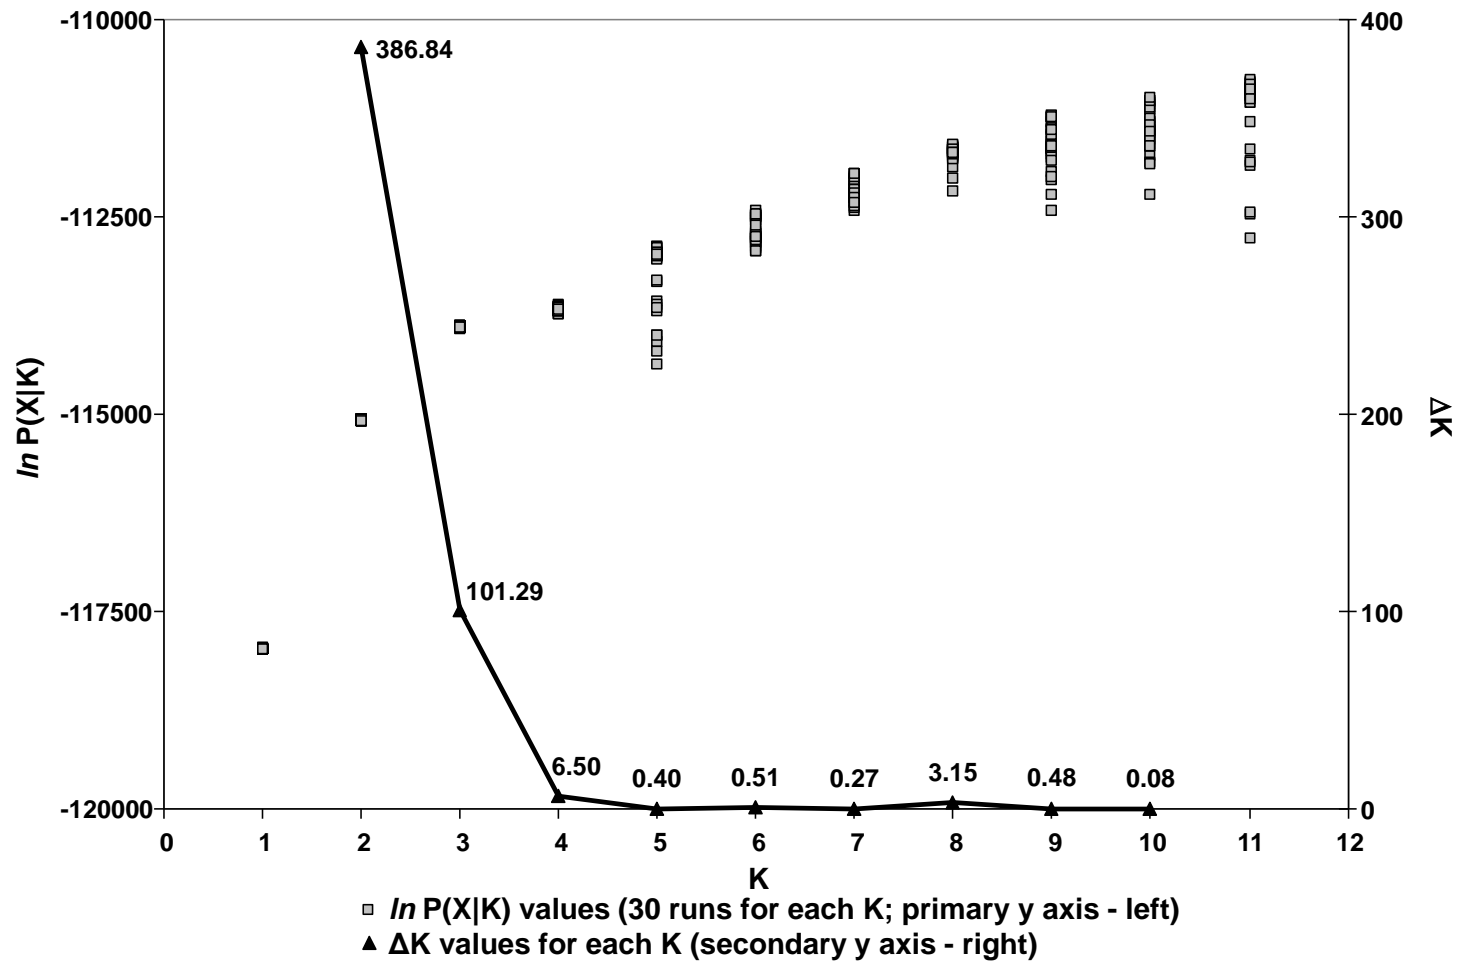

Figure S2. Population structure of 18 *Helichrysum italicum* populations from east Adriatic coast as inferred using BAPS<sup>127</sup> (A) without spatially informative prior, and (B) with spatially informative prior. Each individual is represented by a column, and the color corresponds to the percentage (i.e.  $Q$ -values) of the individual belonging to a particular ancestral population.

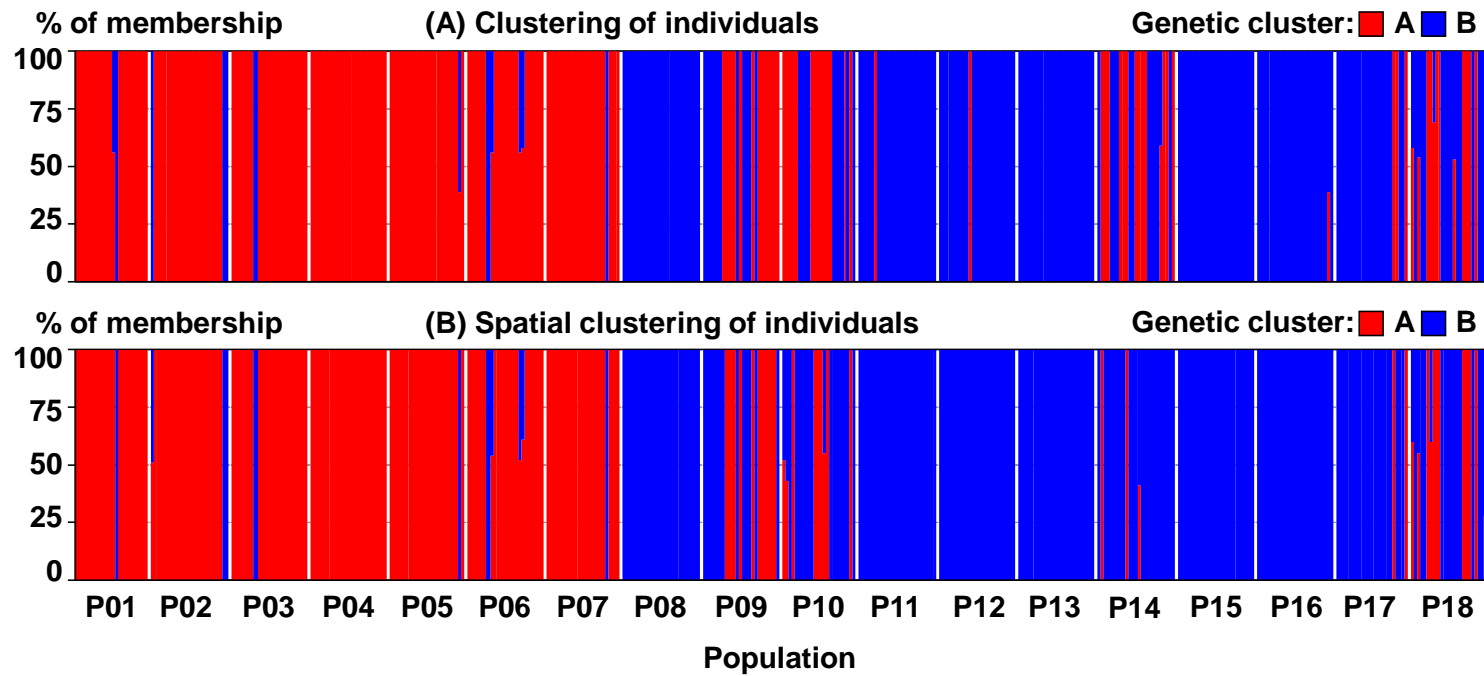

Figure S3. Isolation-by-distance analysis of 18 *Helichrysum italicum* populations from east Adriatic coast: regression of genetic distance [ $F_{ST} / (1 - F_{ST})$ ] on geographical distance [ $\ln(\text{km})$ ] among sampling sites.

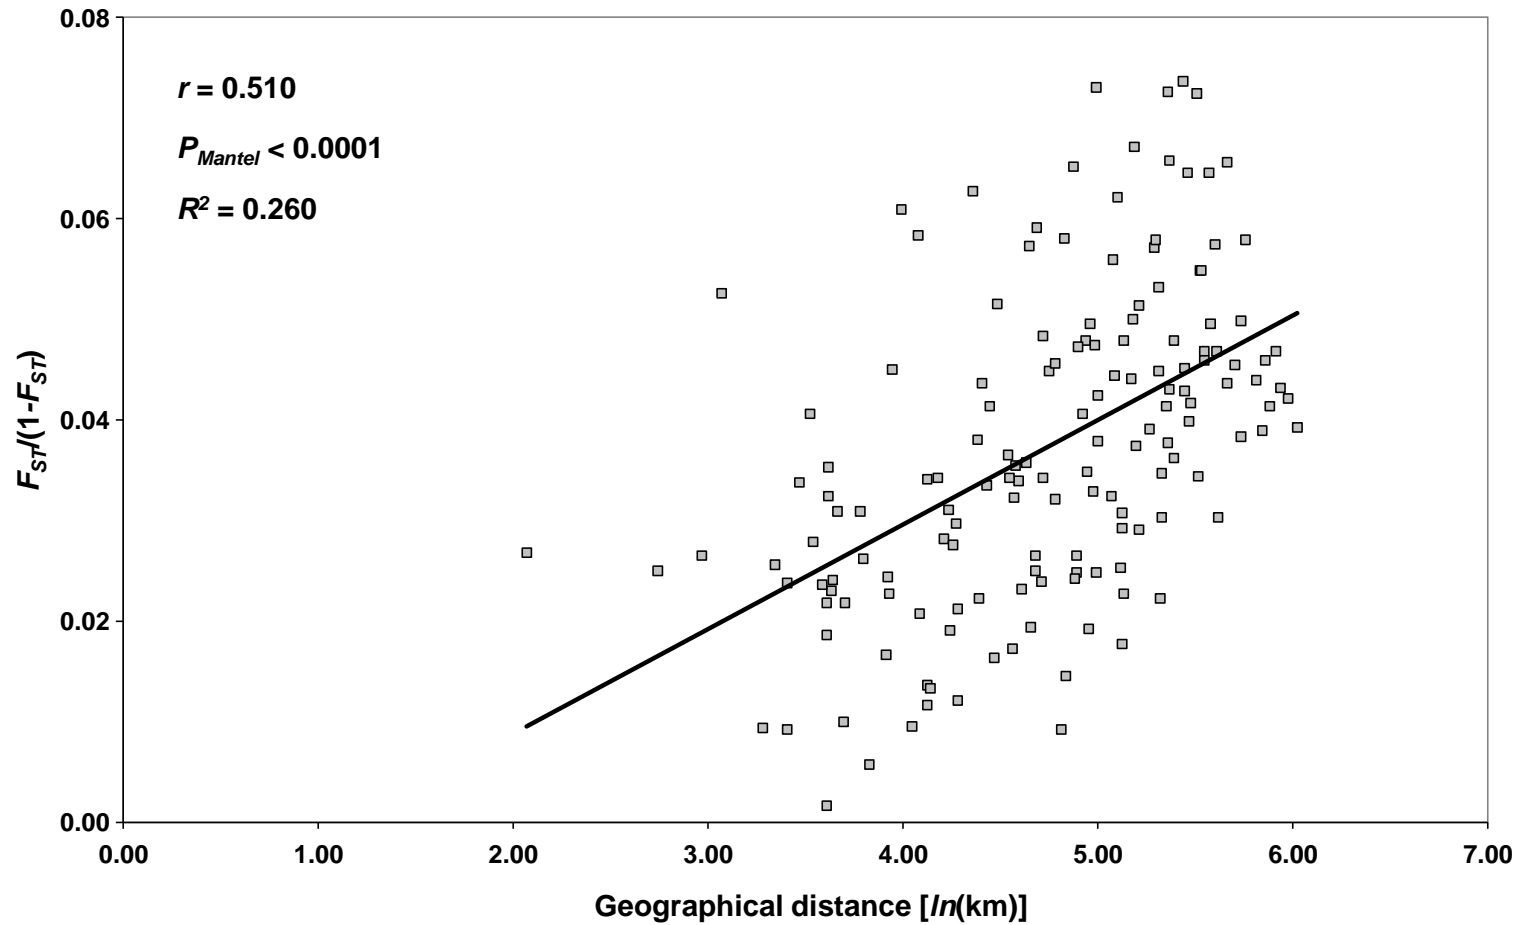

Supplement: 41598_2021_3548_MOESM1_ESM.pdf [file 41598_2021_3548_MOESM1_ESM.pdf]
